# Supplementary material for: Alfonso XIII, un rey contra el pueblo : raíces de la Guerra Civil : una mirada a través de El Socialista, 1917-1923
Source: PeerJ journal article supplement (doi:10.7717/peerj.4246), 2005-01-01

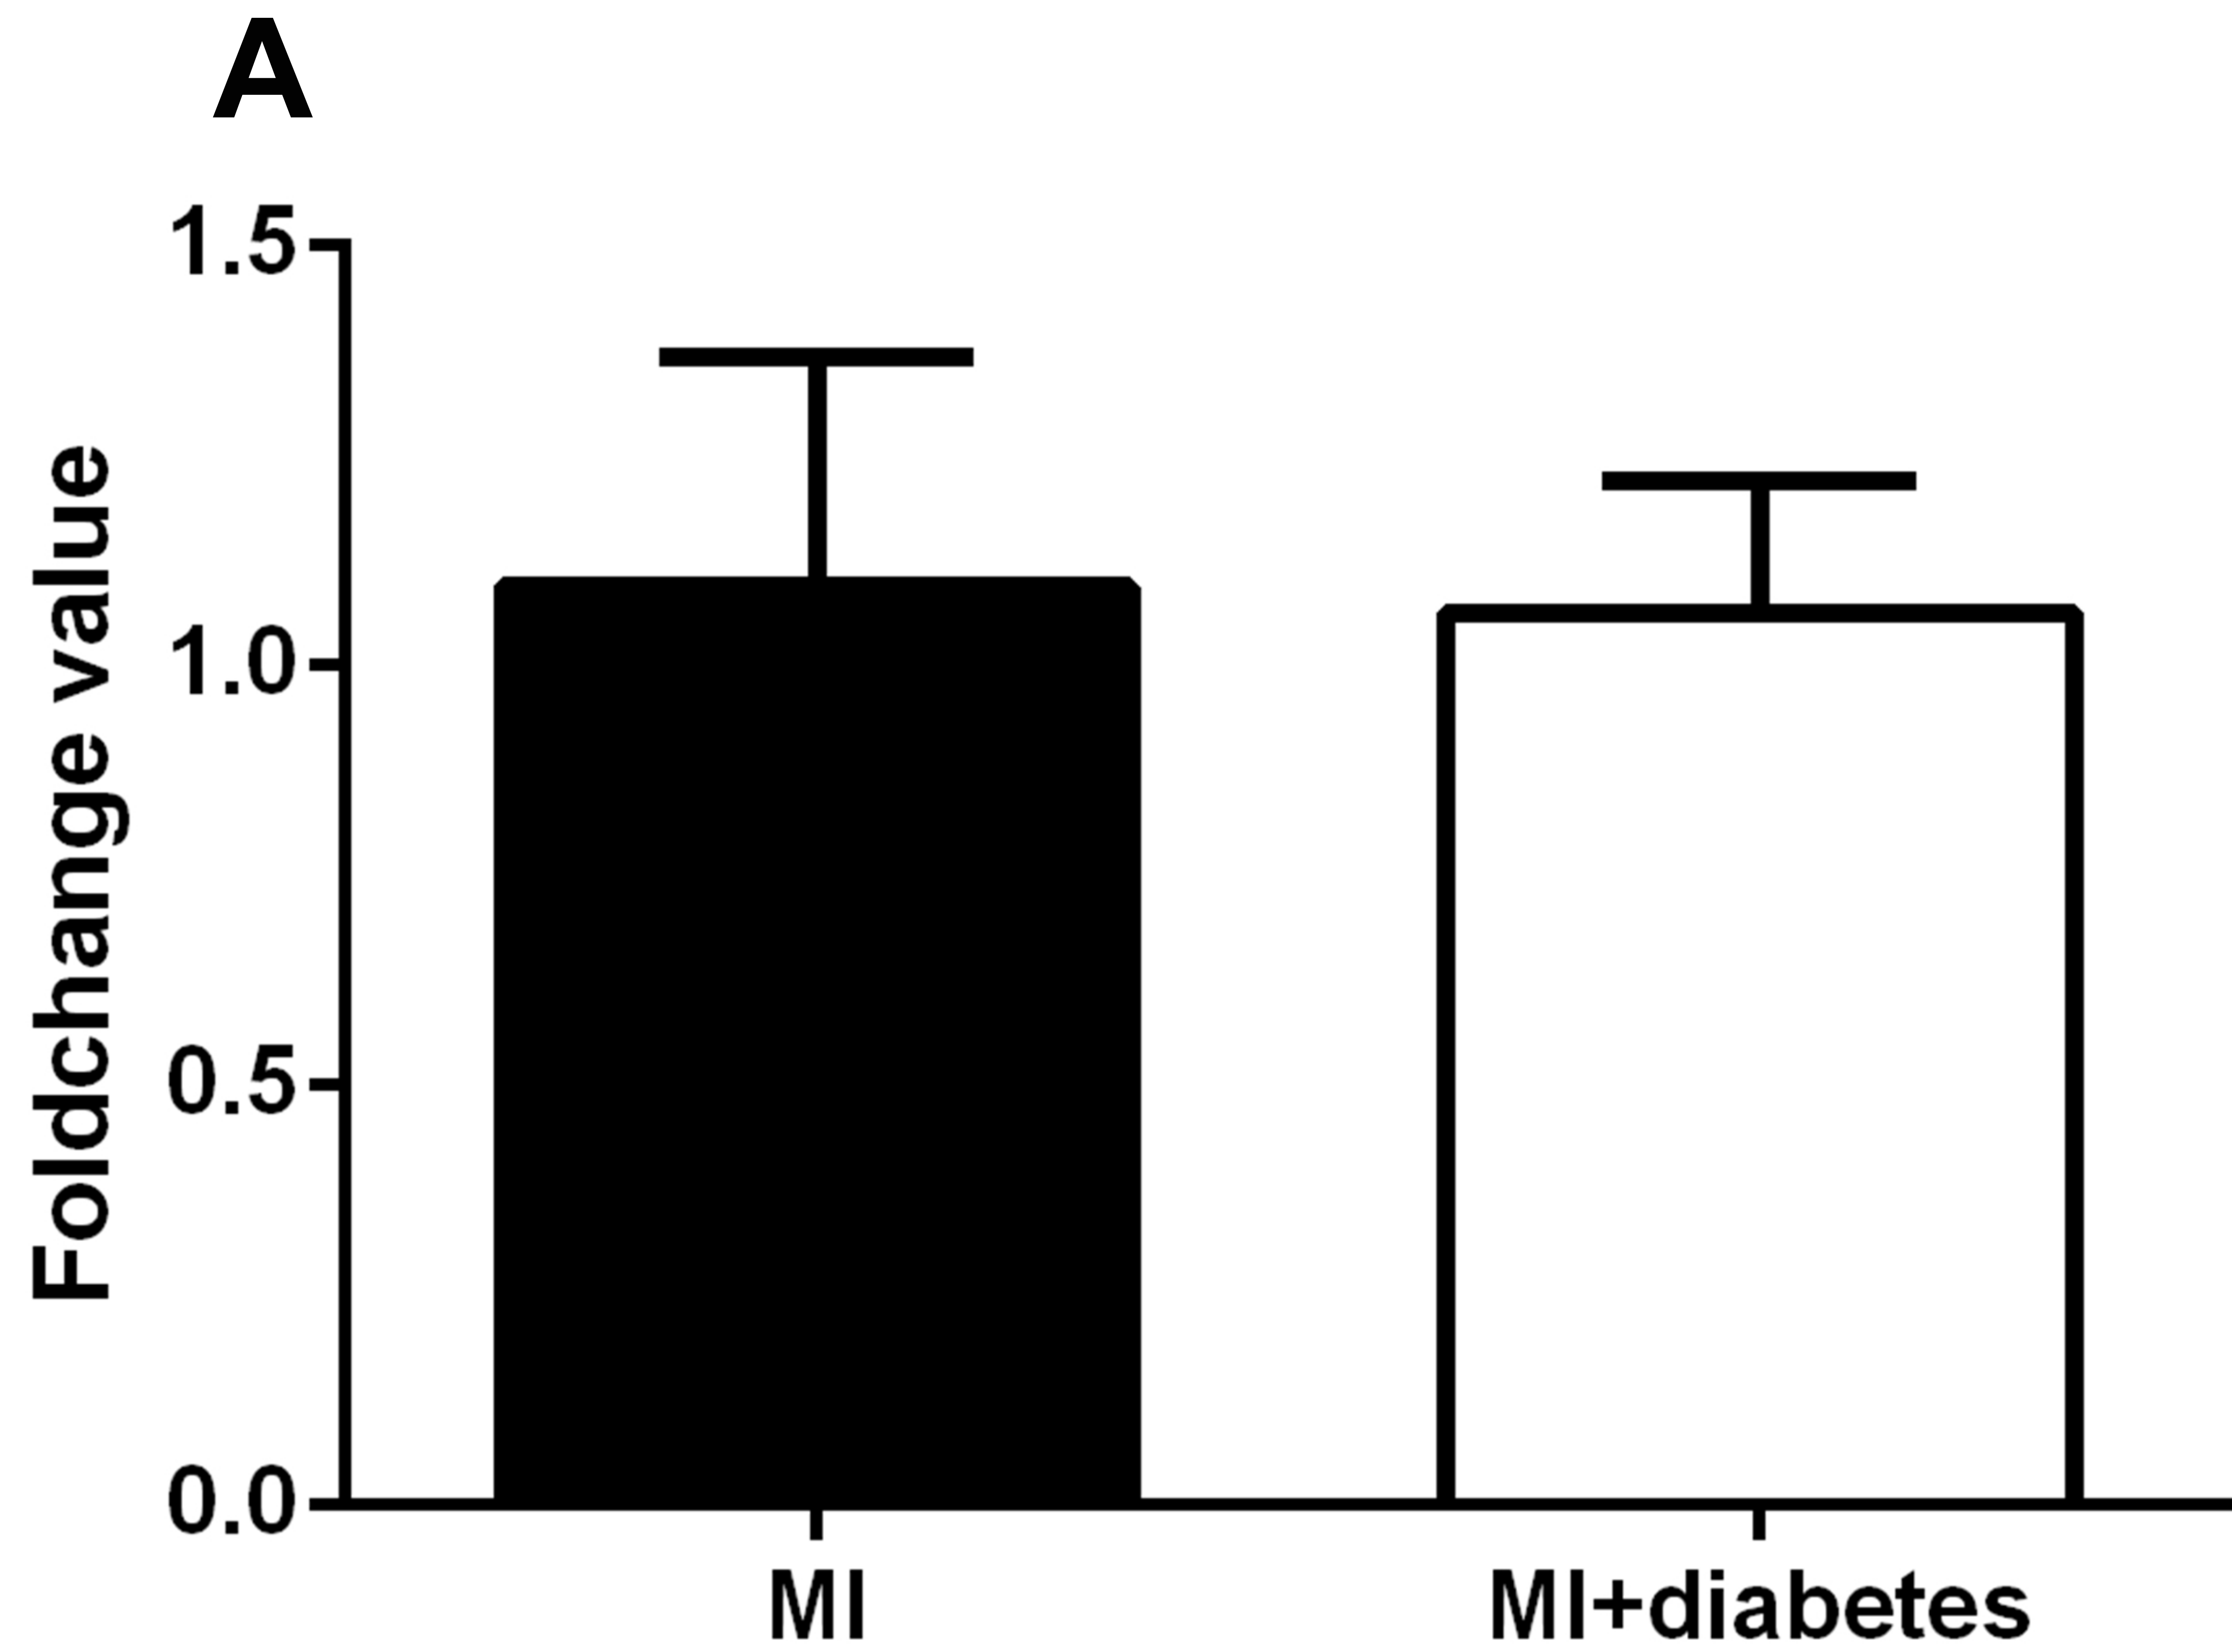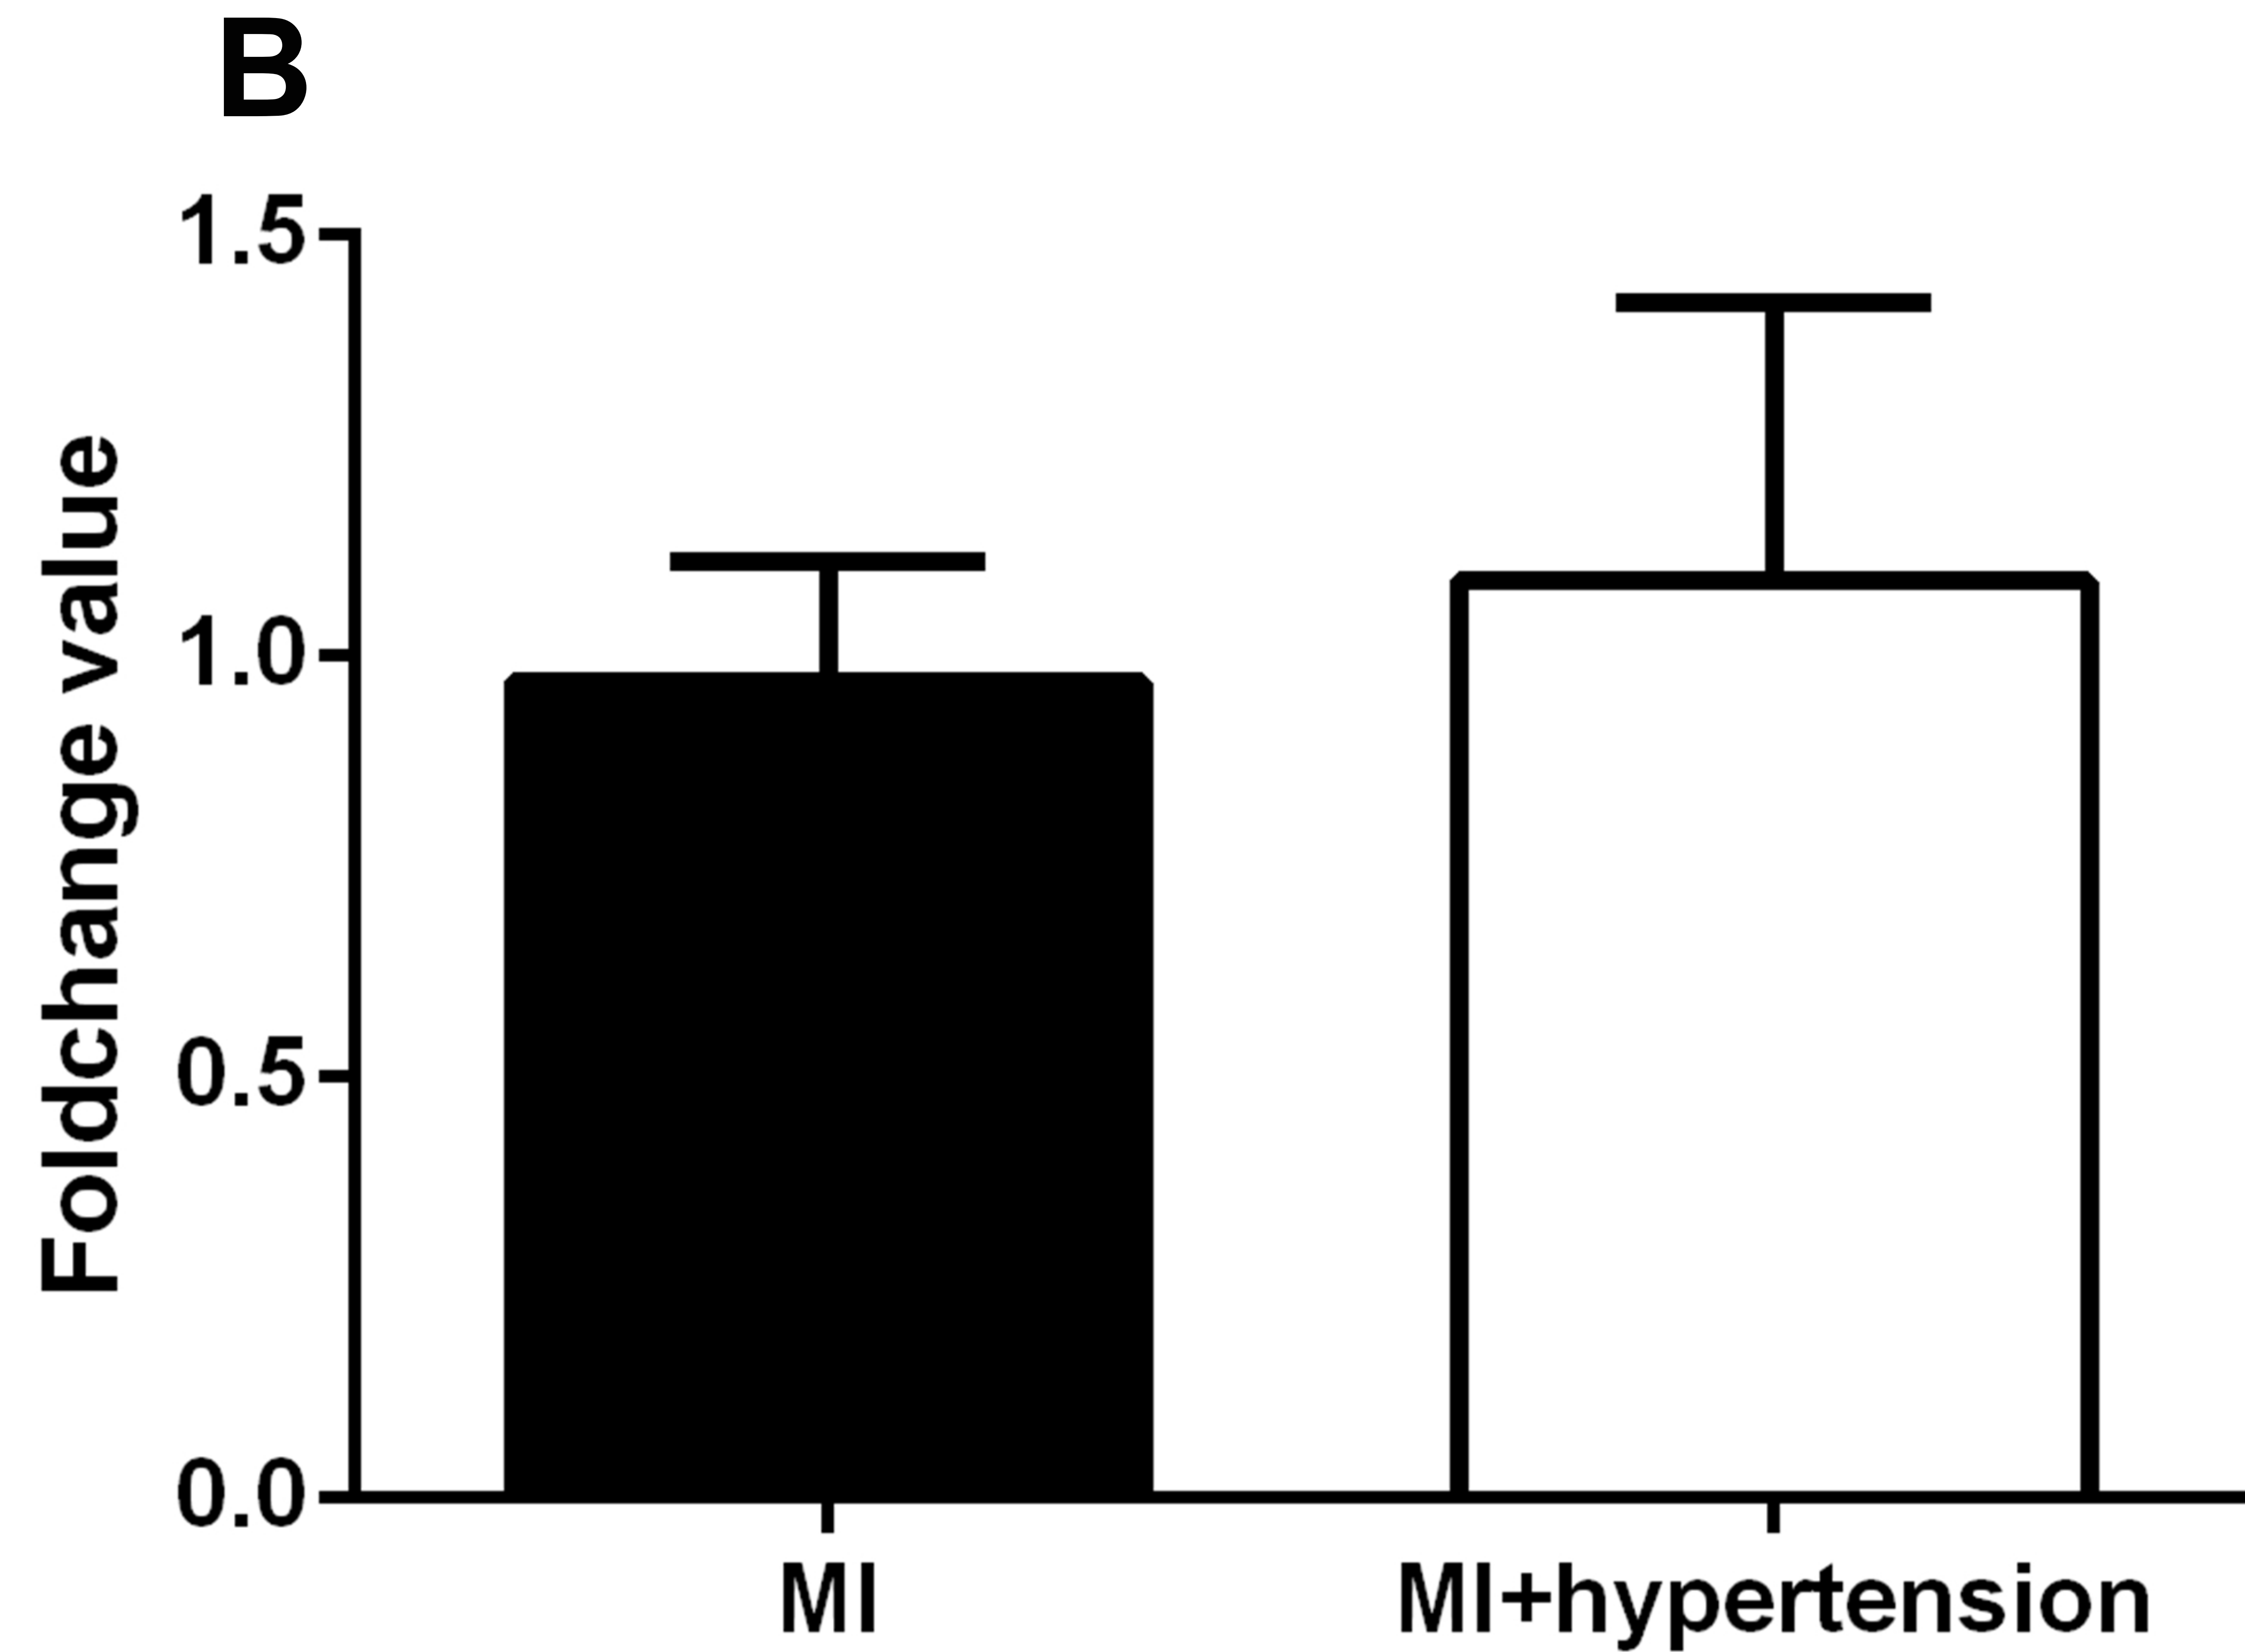

Supplement: Figure_S1.pdf [file Figure_S1.pdf]
